# Supplementary material for: Scalable synthesis of two-dimensional nano-sheet materials with chlorophyll extracts: enhancing the hydrogen evolution reaction
Source: Royal Society of Chemistry journal article supplement (doi:10.1039/c7gc03612d), 2017-12-12
Supplement: c7gc03612d1.pdf [file c7gc03612d1.pdf]

Electronic Supplementary Information

Scalable Synthesis of Two-Dimensional Nano-Sheet Materials with  
Chlorophyll Extracts: Enhancing the Hydrogen Evolution Reaction

I-Wen Peter Chen,<sup>a\*</sup> Ming-You Shie,<sup>b</sup> Ming-Ho Liu,<sup>a</sup> Wei-Ming Huang,<sup>a</sup> Wen-Tai  
Chen<sup>a</sup> and Yu-Ting Chao<sup>a</sup>

<sup>a</sup>Department of Applied Science, National Taitung University, Taitung City, Taiwan

<sup>b</sup>3D Printing Medical Research Center, China Medical University Hospital, Taichung  
City, Taiwan

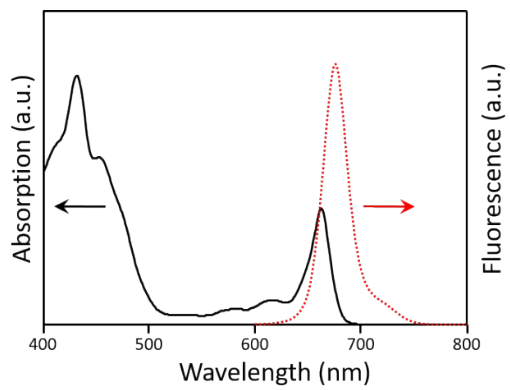

Figure S1. The UV-vis (black solid line) and fluorescence spectrum (red dot line; an excitation wavelength at 450 nm) of the chlorophyll extracts solution.

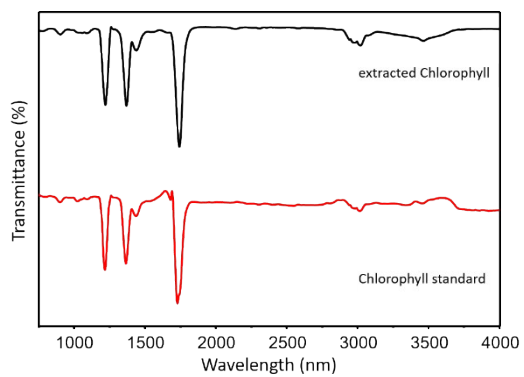

Figure S2. ATR-FTIR spectrum of the extracted chlorophyll (black line) and chlorophyll standard (red line).

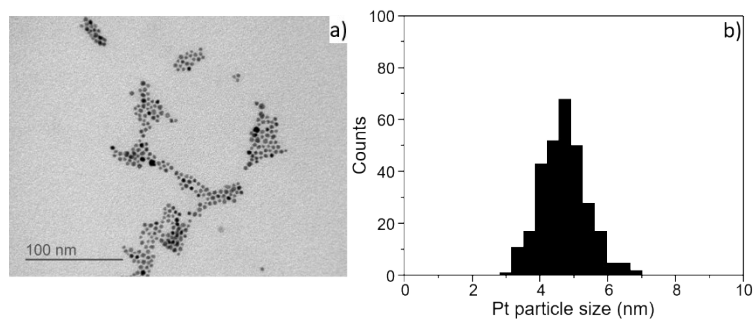

Figure S3. (a) The TEM images of the synthesized PtNPs. (b) The PtNPs size distributions.

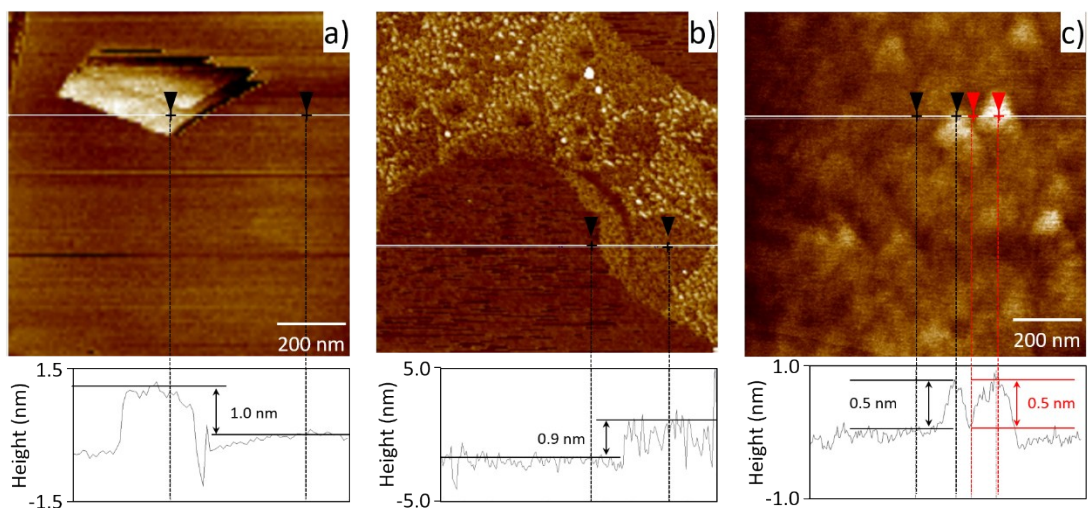

Figure S4. AFM image of the exfoliated (a) graphene, (b) MoS<sub>2</sub> and (c) h-BN transferred onto Si substrate.

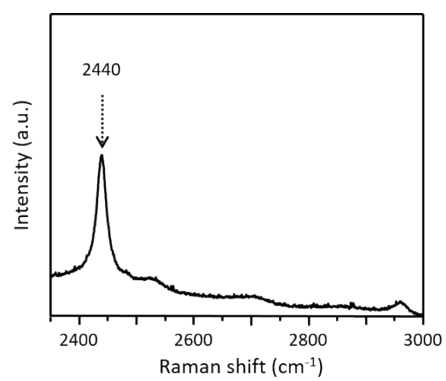

Figure S5. Raman spectrum of chlorophyll extracts.

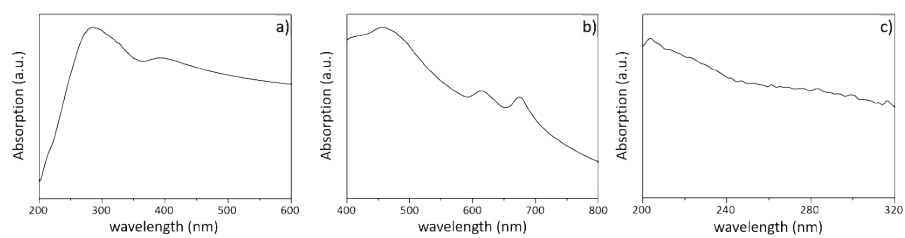

Figure S6. UV-vis spectrum of the exfoliated (a) graphene, (b) MoS<sub>2</sub> and (c) h-BN suspension.

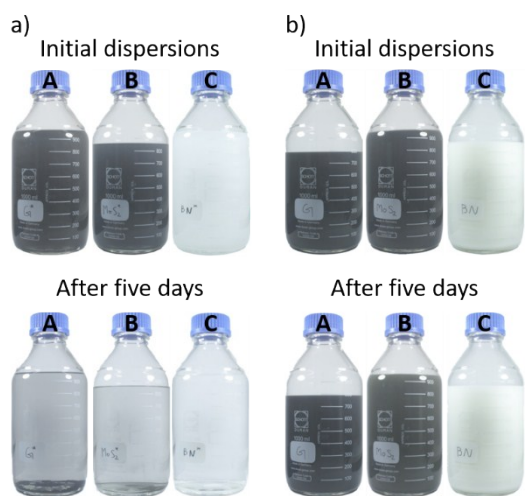

Figure S7. Comparative stability of the suspension of the exfoliated graphene (bottle A), MoS<sub>2</sub> (bottle B), and h-BN (bottle C). (a) without and (b) with chlorophyll extracts.



Initial dispersions

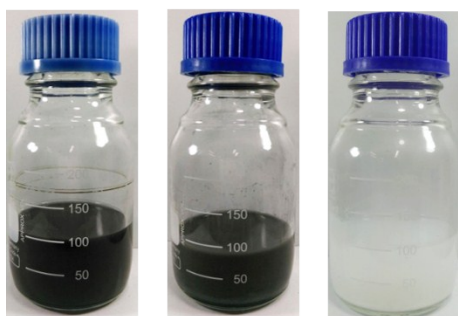

After five days

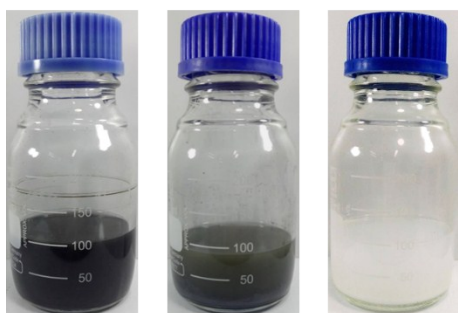

Figure S8. Stability of the suspension of the commercial available chlorophyll-assisted exfoliated graphene (left), MoS<sub>2</sub> (middle), and h-BN (right) suspensions.

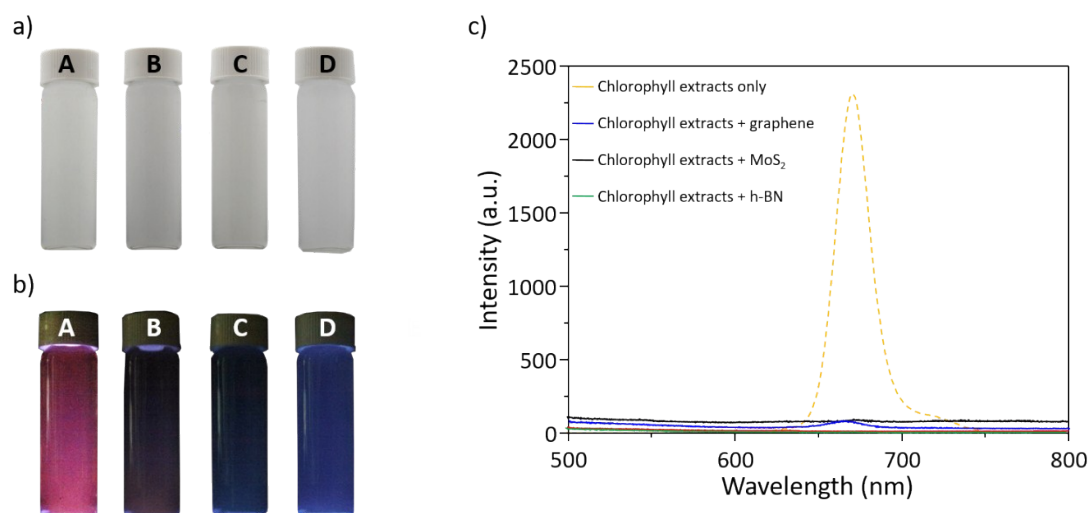

Figure S9. (a) Photographs and (b) Fluorescence of chlorophyll extracts (bottle A), chlorophyll extracts + graphene (bottle B), chlorophyll extracts + MoS<sub>2</sub> (bottle C), and chlorophyll extracts + h-BN (bottle D). (c) The fluorescence spectra of chlorophyll extracts and chlorophyll extracts mixed with different 2D material solutions.

Initial dispersions

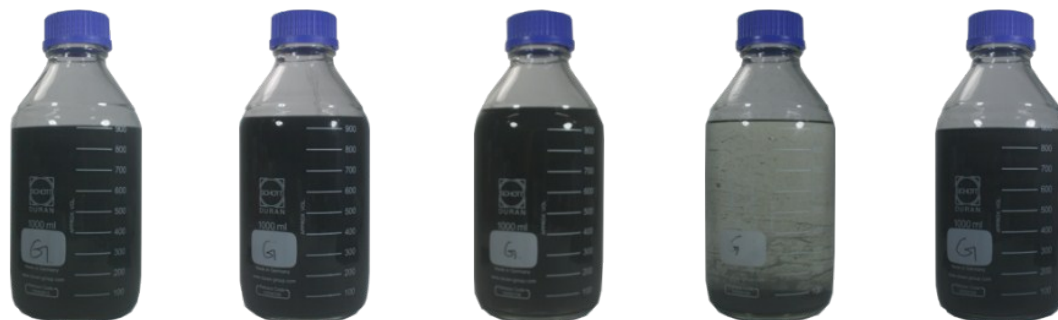

After five days

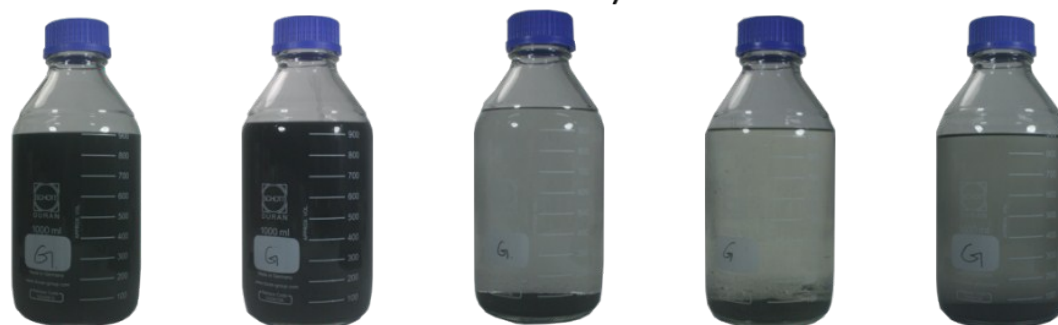

Figure S10. Stability of chlorophyll extracts-assisted exfoliated graphene in solvents. Stable homogeneous suspensions of chlorophyll-assisted exfoliated graphene in various solvents after five days, from left to right: tetrahydrofuran, ethyl acetate, ethanol, hexane, and toluene.

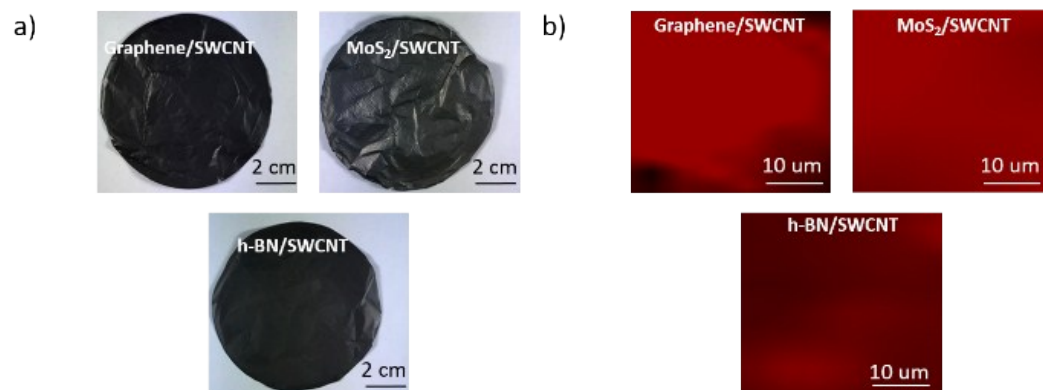

Figure S11. (a) Photograph of free-standing composite paper of graphene/SWCNT, MoS<sub>2</sub>/SWCNT, and h-BN/SWCNT. (b) Raman mapping image of the four composite papers by extracting the frequency of the characteristic peak of each 2D material. The Raman 2D mapping area is  $30 \times 30 \mu\text{m}$ .

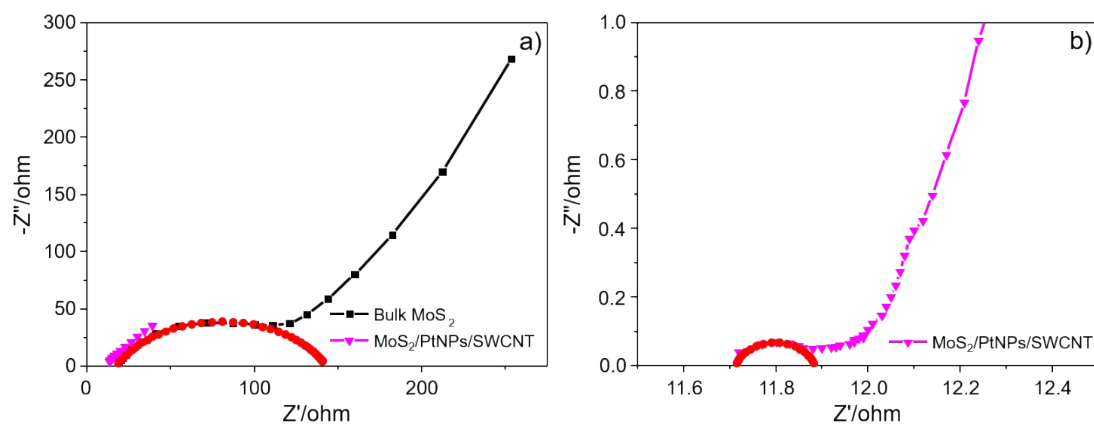

Figure S12. EIS spectra of the bulk MoS<sub>2</sub> (black square) and MoS<sub>2</sub>/PtNPs/SWCNT (pink triangle) at low frequency with -0.1 V vs RHE in 0.5 M H<sub>2</sub>SO<sub>4</sub> electrolyte. Red dots indicate fitting curve of the bulk MoS<sub>2</sub> and MoS<sub>2</sub>/PtNPs/SWCNT paper.

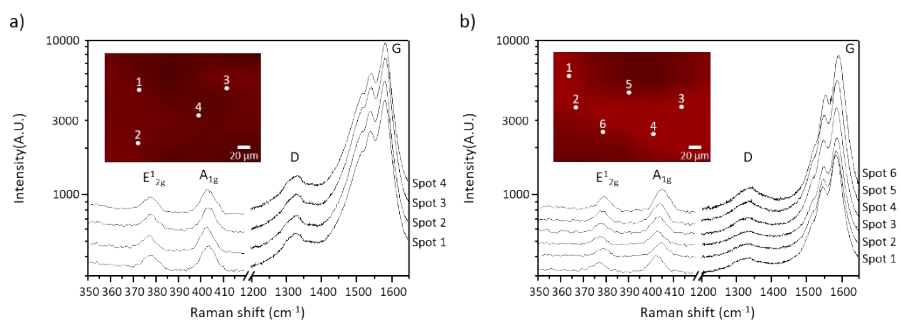

Figure S13. Raman spectra of the MoS<sub>2</sub>/PtNPs/SWCNT paper were recorded a) before and b) after 100 h stability tests at a constant potential of -50 mV in 0.5 M H<sub>2</sub>SO<sub>4</sub> solution.

Table S1. Summary of literature reported exchange current density of various HER catalysts.

| Catalyst                                                                | Onset potential (mV) | Tafel slope (mV/dec) | Exchange current density (mA/cm <sup>2</sup> ) | Year      | Journal                     | Ref. |
|-------------------------------------------------------------------------|----------------------|----------------------|------------------------------------------------|-----------|-----------------------------|------|
| MoS <sub>2</sub> /PtNPs/SWCNT paper                                     | -11                  | 38                   | 7.1 x 10 <sup>-1</sup>                         | This work |                             |      |
| Chlorophyll extracts - assisted exfoliated MoS <sub>2</sub> thin sheets | -58                  | 46                   | 1.4 x 10 <sup>-1</sup>                         | This work |                             |      |
| P-doped 2H-MoS <sub>2</sub>                                             | -103                 | 49                   | N/A                                            | 2017      | <i>Adv. Funct. Mater.</i>   | 1    |
| Hydrothermal synthesis stepped edge-MoS <sub>2</sub> on carbon fiber    | ~-75                 | 59                   | 2 x 10 <sup>-1</sup>                           | 2017      | <i>Energy Environ. Sci.</i> | 2    |
| Molybdenum Disulfide-Black Phosphorus                                   | ~-40                 | 68                   | 6.6 x 10 <sup>-1</sup>                         | 2017      | <i>Nano Lett.</i>           | 3    |
| strained MoS <sub>2</sub> with S-vacancy                                | ~-140                | 60                   | 2~4 x 10 <sup>-2</sup>                         | 2016      | <i>Nat. Mater.</i>          | 4    |
| 2H Basal plane of monolayer MoS <sub>2</sub>                            | N.A.                 | ~ 50                 | 7~16 x 10 <sup>-3</sup>                        | 2016      | <i>Nat. Mater.</i>          | 5    |
| ground MoS <sub>2</sub> microflake in the 900 °C annealing              | ~-240                | 76                   | 9 x 10 <sup>-2</sup>                           | 2016      | <i>Nano Lett.</i>           | 6    |
| MoS <sub>2</sub> annealed under 500 °C                                  | ~-300                | 147                  | N/A                                            | 2016      | <i>Nano Lett.</i>           | 7    |
| semiconductor phase of MoS <sub>2</sub> (S-MoS <sub>2</sub> )           | ~-225                | 135                  | 4 x 10 <sup>-2</sup>                           | 2016      | <i>Nat. Commun.</i>         | 8    |
| Metallic-phase MoS <sub>2</sub> (M-MoS <sub>2</sub> )                   | ~-150                | 41                   | 1 x 10 <sup>-1</sup>                           | 2016      | <i>Nat. Commun.</i>         | 8    |
| edge-terminated MoS <sub>2</sub>                                        | -103                 | 49                   | 9.62 x 10 <sup>-3</sup>                        | 2015      | <i>Nat. Commun.</i>         | 9    |
| MoS <sub>2</sub>                                                        | -237                 | 101                  | 9.1 x 10 <sup>-4</sup>                         | 2015      | <i>Nat.</i>                 | 10   |

|                                                                 |      |      |                         |           |                     |               |
|-----------------------------------------------------------------|------|------|-------------------------|-----------|---------------------|---------------|
|                                                                 |      |      |                         |           | <i>Commun.</i>      |               |
| MoS <sub>2</sub> /CoSe <sub>2</sub>                             | -11  | 36   | 7.3 x 10 <sup>-2</sup>  | 2015      | <i>Nat. Commun.</i> | <sup>10</sup> |
| Ni-Mo-S/C                                                       | ~140 | 85.3 | 4.89 x 10 <sup>-2</sup> | 2015      | <i>Sci. Adv.</i>    | <sup>11</sup> |
| Defect-rich ultrathin MoS <sub>2</sub> nanosheets               | -120 | 50   | 8.91 x 10 <sup>-3</sup> | 2013      | <i>Adv. Mater.</i>  | <sup>12</sup> |
| Chlorophyll extracts - assisted exfoliated graphene thin sheets | -183 | 124  | 3.3 x 10 <sup>-2</sup>  | This work |                     |               |
| Chlorophyll extracts - assisted exfoliated h-BN thin sheets     | -179 | 159  | 6 x 10 <sup>-2</sup>    | This work |                     |               |

Reference:

- (1) Huang, X.; Leng, M.; Xiao, W.; Li, M.; Ding, J.; Tan, T. L.; Lee, W. S. V.; Xue, J.; Activating Basal Planes and S-Terminated Edges of MoS<sub>2</sub> toward More Efficient Hydrogen Evolution. *Adv. Funct. Mater.* **2017**, *27*, 1604943.
- (2) Hu, J.; Huang, B.; Zhang, C.; Wang, Z.; An, Y.; Zhou, D.; Lin, H.; Leung, M. K. H.; Yang, S.; Engineering Stepped Edge Surface Structures of MoS<sub>2</sub> Sheet Stacks to Accelerate the Hydrogen Evolution Reaction. *Energy Environ. Sci.* **2017**, *10*, 593-603.
- (3) He, R.; Hua, J.; Zhang, A.; Wang, C.; Peng, J.; Chen, W.; Zeng, J.; Molybdenum Disulfide-Black Phosphorus Hybrid Nanosheets as a Superior Catalyst for Electrochemical Hydrogen Evolution. *Nano Lett.* **2017**, *17*, 4311-4316.
- (4) Li, H.; Tsai, C.; Koh, A. L.; Cai, L.; Contryman, A. W.; Fragapane, A. H.; Zhao, J.; Han, H. S.; Manoharan, H. C.; Abild-Pedersen, F.; Nørskov, J. K.; Zheng, X.; Activating and Optimizing MoS<sub>2</sub> Basal Planes for Hydrogen Evolution through the Formation of Strained Sulphur Vacancies. *Nat. Mater.* **2016**, *15*, 48-54.
- (5) Voiry, D.; Fullon, R.; Yang, J.; Silva, C. d. C. C. e.; Kappera, R.; Bozkurt, I.; Kaplan, D.; Lagos, M. J.; Batson, P. E.; Gupta, G.; Mohite, A. D.; Dong, L.; Er, D.; Shenoy, V. B.; Asefa, T.; Chhowalla, M.; The Role of Electronic Coupling between Substrate and 2D MoS<sub>2</sub> Nanosheets in Electrocatalytic Production of Hydrogen. *Nat. Mater.* **2016**, *15*, 1003-1009.
- (6) Kiriya, D.; Lobaccaro, P.; Nyein, H. Y. Y.; Taher, P.; Hettick, M.; Shiraki, H.; Sutter-Fella, C. M.; Zhao, P.; Gao, W.; Maboudian, R.; Ager, J. W.; Javey, A.; General Thermal Texturization Process of MoS<sub>2</sub> for Efficient Electrocatalytic Hydrogen Evolution Reaction. *Nano Lett.* **2016**, *16*, 4047-4053.
- (7) Ye, G.; Gong, Y.; Lin, J.; Li, B.; He, Y.; Pantelides, S. T.; Zhou, W.; Vajtai, R.; Ajayan, P. M.; Defects Engineered Monolayer MoS<sub>2</sub> for Improved Hydrogen



Evolution Reaction. *Nano Lett.* **2016**, *16*, 1097-1103.

- (8) Geng, X.; Sun, W.; Wu, W.; Chen, B.; Al-Hilo, A.; Benamara, M.; Zhu, H.; Watanabe, F.; Cui, J.; Chen, T.-p.; Pure and Stable Metallic Phase Molybdenum Disulfide Nanosheets for Hydrogen Evolution Reaction. *Nat. Commun.* **2016**, *7*, 10672.
- (9) Gao, M.-R.; Chan, M. K. Y.; Sun, Y.; Edge-Terminated Molybdenum Disulfide with a 9.4-Å Interlayer Spacing for Electrochemical Hydrogen Production. *Nat. Commun.* **2015**, *6*, 7493.
- (10) Gao, M.-R.; Liang, J.-X.; Zheng, Y.-R.; Xu, Y.-F.; Jiang, J.; Gao, Q.; Li, J.; Yu, S.-H.; An Efficient Molybdenum Disulfide/Cobalt Diselenide Hybrid Catalyst for Electrochemical Hydrogen Generation. *Nat. Commun.* **2015**, *6*, 5982.
- (11) Miao, J.; Xiao, F.-X.; Yang, H. B.; Khoo, S. Y.; Chen, J.; Fan, Z.; Hsu, Y.-Y.; Chen, H. M.; Zhang, H.; Liu, B.; Hierarchical Ni-Mo-S Nanosheets on Carbon Fiber Cloth: A Flexible Electrode for Efficient Hydrogen Generation in Neutral Electrolyte. *Sci. Adv.* **2015**, *1*, e1500259.
- (12) Xie, J.; Zhang, H.; Li, S.; Wang, R.; Sun, X.; Zhou, M.; Zhou, J.; Lou, X. W. D.; Xie, Y.; Defect-Rich MoS<sub>2</sub> Ultrathin Nanosheets with Additional Active Edge Sites for Enhanced Electrocatalytic Hydrogen Evolution. *Adv. Mater.* **2013**, *25*, 5807-5813.

Table S2. EDS analysis of the MoS<sub>2</sub>/PtNPs/SWCNT paper.

| Element    | Atomic (%) | Weight (%) |
|------------|------------|------------|
| Platinum   | 0.03       | 0.26       |
| Molybdenum | 7.04       | 32.18      |
| Sulfur     | 12.89      | 19.69      |
